# Supplementary material for: An enzyme-induced Au@Ag core–shell nanoStructure used for an ultrasensitive surface-enhanced Raman scattering immunoassay of cancer biomarkers
Source: Royal Society of Chemistry journal article supplement (doi:10.1039/c6nr07979b), 2017-01-01
Supplement: c6nr07979b1.pdf [file c6nr07979b1.pdf]

## Supporting Information

*for*

### **An Enzyme-Induced Au@Ag Core-Shell NanoStructure Used for Ultrasensitive Surface-Enhanced Raman Scattering Immunoassay of Cancer Biomarker**

**Lin Yang<sup>a</sup>, Ming Xuan Gao<sup>b</sup>, Lei Zhan<sup>a</sup>, Min Gong<sup>c</sup>, Shu Jun Zhen<sup>b\*</sup> and Cheng  
Zhi Huang<sup>a,\*</sup>**

<sup>a</sup>Key Laboratory of Luminescence and Real-Time Analytical Chemistry (Southwest University),  
Ministry of Education, College of Pharmaceutical Sciences, Southwest University, Chongqing 400715,  
P. R. China. E-mail: [chengzhi@swu.edu.cn](mailto:chengzhi@swu.edu.cn)

<sup>b</sup> College of Chemistry and Chemical Engineering, Southwest University, Chongqing 400715,  
P.R.China. E-mail: [zsj@swu.edu.cn](mailto:zsj@swu.edu.cn)

<sup>c</sup>Department of Pathology, Institute of Surgery Research, Daping Hospital, Chongqing, 400042,  
P.R.China

The influence parameters for the enzyme-induced silver deposition reaction.

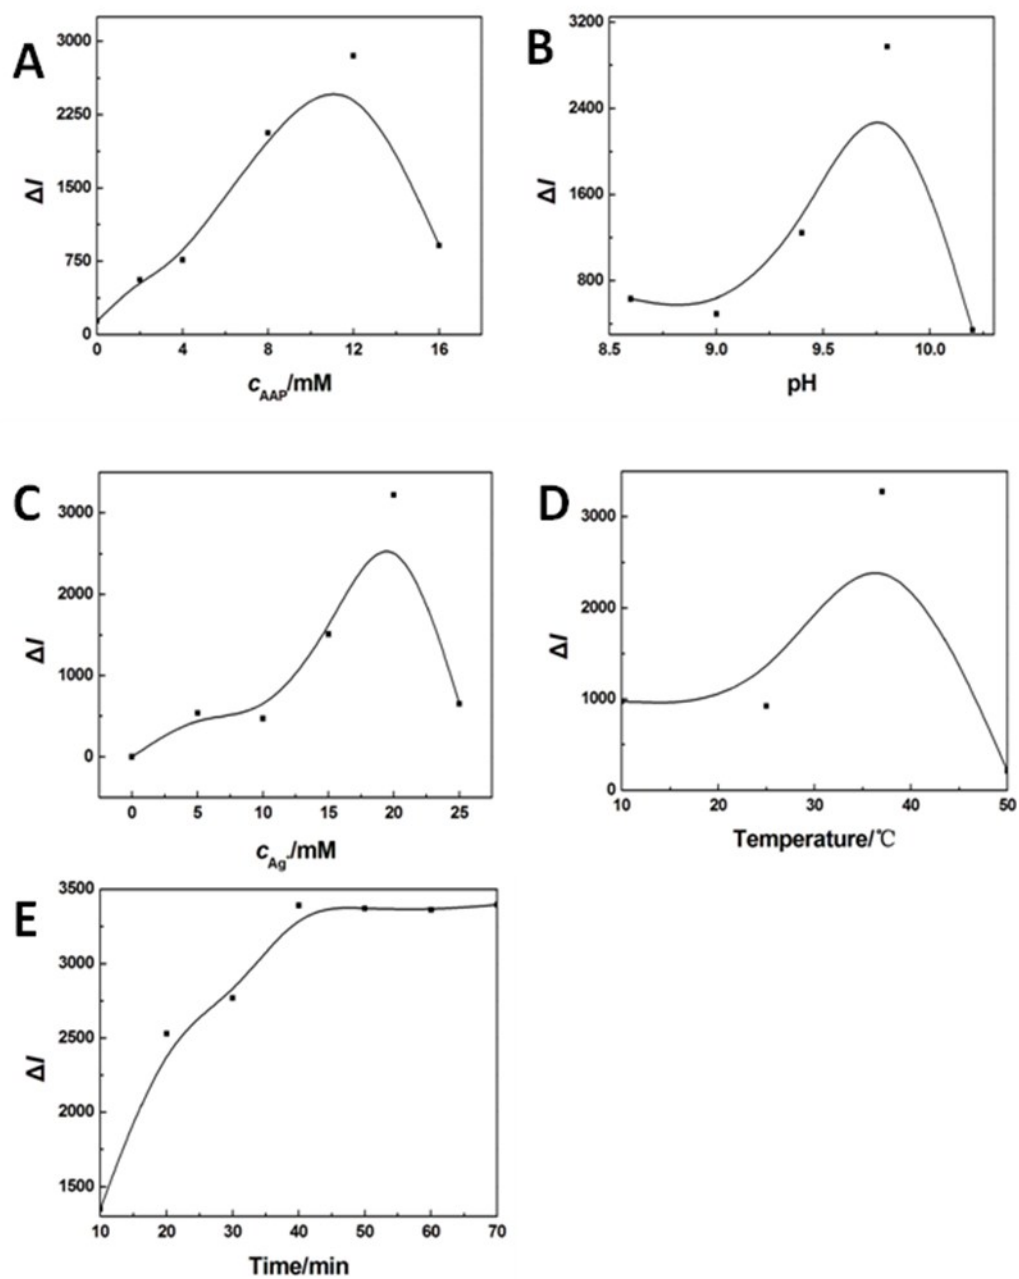

Figure S1. The efforts of (A) AAP concentration, (B) pH, (C)  $Ag^+$  concentration, (D) reaction temperature, (E) reaction time on SERS intensity of detection solution at 1586  $cm^{-1}$ .

**The original SERS spectra of the serum samples.**

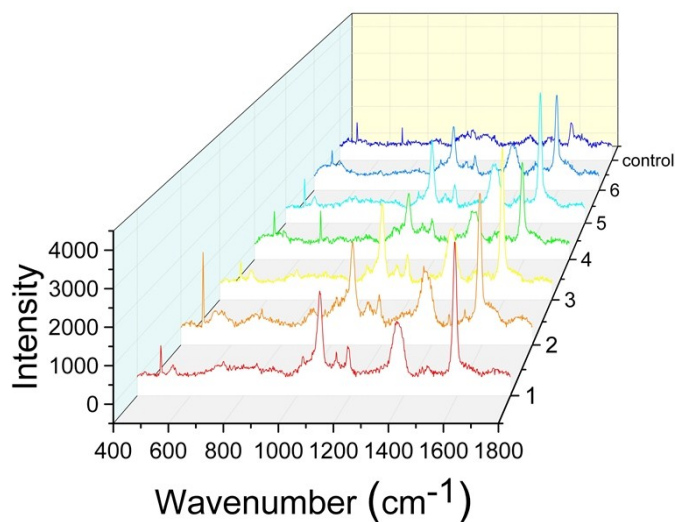

Figure S2. The original SERS spectra of the serum samples.

**Comparison with other immunoassay proposed in literatures.**

**Table S1. Comparison of the Developed Immunoassay with Others in the Detection of AFP**

| Immunoassay method       | Label                 | Detection range<br>(ng/mL) | Detection limit<br>(ng/mL) | Reference |
|--------------------------|-----------------------|----------------------------|----------------------------|-----------|
| SERS                     | AuNPs/RT <sup>c</sup> | 1-100                      | 0.1                        | 1         |
| SERS                     | AgNPs/RT <sup>d</sup> | 0.1-1.5                    | 0.1                        | 2         |
| SERRS <sup>a</sup>       | silver paper          | 1-500                      | 0.33                       | 3         |
| Colorimetric assay       | AuNPs                 | 10-40                      | 100                        | 4         |
| Fluoroimmunoassay        | AuNPs                 | 20-400                     | 12                         | 5         |
| Fluoroimmunoassay        | Quantum dots          | 2.4-960                    | 0.4                        | 6         |
| LA-ICPMS <sup>b</sup>    | AuNPs                 | 1-500                      | 0.2                        | 7         |
| chemiluminescent         | HRP                   | 0.2-90                     | 0.068                      | 8         |
| Electrochemiluminescence | CdTe nanocrystals     | 0.001-80.0                 | $5 \times 10^{-3}$         | 9         |
| Electrochemical assay    | HRP                   | 5-80                       | 3.7                        | 10        |
| Electrochemical assay    | HRP                   | 0.05-6                     | 0.02                       | 11        |
| SERS                     | Au@Ag/RT <sup>c</sup> | $5 \times 10^{-4}$ -0.1    | $8.1 \times 10^{-5}$       | this work |

<sup>a</sup>SERS, Surface-Enhanced Resonance Raman Spectroscopy. <sup>b</sup>LA-ICPMS, Laser Ablation Inductively Coupled Plasma Mass. <sup>c</sup>RT, Raman tag, 4-Mercaptobenzoic acid. <sup>d</sup>RT, malachite green isothiocyanate

**REFERENCE**

- (1) Wang A., Ruan W., Song W., Chen L., Zhao B., Jung Y. M., Wang X., *J. Raman Spectrosc.* **2013**, *44*, 1649-1653.
- (2) Hwang H., Chon H., Choo J., Park J.-K., *Anal. Chem.* **2010**, *82*, 7603-7610.
- (3) Chen Y., Cheng H., Tram K., Zhang S., Zhao Y., Han L., Chen Z., Huan S., *Analyst* **2013**, *138*, 2624-2631.

- (4) Nietzold C., Lisdat F., *Analyst* **2012**,*137*. 2821-2826.
- (5) Ao L., Gao F., Pan B., He R., Cui D., *Anal. Chem.* **2006**,*78*. 1104-1106.
- (6) Chen M.-J., Wu Y.-S., Lin G.-F., Hou J.-Y., Li M., Liu T.-C., *Anal. Chim. Acta* **2012**,*741*. 100-105.
- (7) Hu S., Zhang S., Hu Z., Xing Z., Zhang X., *Anal. Chem.* **2007**,*79*. 923-929.
- (8) Liu H., Yang Z., Yan F., Xu Y., Ju H., *Anal. Chem.* **2009**,*81*. 4043-4047.
- (9) Liang G., Liu S., Zou G., Zhang X., *Anal. Chem.* **2012**,*84*. 10645-10649.
- (10) Giannetto M., Elviri L., Careri M., Mangia A., Mori G., *Biosens. Bioelectron.* **2011**,*26*. 2232-2236.
- (11) Du D., Zou Z., Shin Y., Wang J., Wu H., Engelhard M. H., Liu J., Aksay I. A., Lin Y., *Anal. Chem.* **2010**,*82*. 2989-2995.
